# Supplementary material for: Core–shell Si1−xGex nanowires with controlled structural defects for phonon scattering enhancement
Source: Royal Society of Chemistry journal article supplement (doi:10.1039/c4ta01880j), 2014-01-01
Supplement: c4ta01880j1.pdf [file c4ta01880j1.pdf]

Supplementary Information for

## **Core-Shell Si<sub>1-x</sub>Ge<sub>x</sub> Nanowires with Controlled Structural Defects for Phonon Scattering Enhancement**

Jong Woon Lee,<sup>a,g</sup> Junho Lee,<sup>b</sup> Su-in Yi,<sup>c</sup> Young Min Seo,<sup>f,g</sup> Byoung Lyong Choi,<sup>d</sup> Choongho Yu,<sup>c</sup>  
Cheol-Woong Yang,<sup>f</sup> Sungwoo Hwang,<sup>d,g</sup> Sungjin Kim,<sup>e</sup> Dongmok Whanga,<sup>f,g\*</sup> and Eun Kyung Lee<sup>e\*</sup>

<sup>a</sup> SKKU Advanced Institute of Nanotechnology, Sungkyunkwan University, Suwon, 440-746, Korea.

<sup>b</sup> Analytical Engineering Group, Samsung Advanced Institute of Technology, Samsung Electronics, Yongin, Kyunggi-do 446-712, Korea.

<sup>c</sup> Department of Mechanical Engineering, Texas A&M University, College Station, TX 77843 USA.

<sup>d</sup> Nano Electronics Laboratory, Samsung Advanced Institute of Technology, Samsung Electronics, Giheung-gu, Yongin-si, Gyeonggi-do, 446-712, Korea.

<sup>e</sup> Computer Aided Group, Samsung Advanced Institute of Technology, Samsung Electronics, Yongin, Kyunggi-do, 446-712, Korea.

<sup>f</sup> School of Advanced Materials Science and Engineering, Sungkyunkwan University, Suwon, 440-746, Korea.

<sup>g</sup> Research Center for Time-Domain Nano-Functional Devices, Samsung Advanced Institute of Technology, Giheung, Yong-In, Gyeonggi, 446-712, Korea.

## 2-point I-V curve data

**Table S1.** The top, bottom and average diameters of the tapered  $\text{Si}_{1-x}\text{Ge}_x$  alloy nanowires, which are used to calculate the electrical resistivity via 2-point measurement

| Top diameter (nm) | Bottom diameter (nm) | Average diameter (nm) | Channel length ( $\mu\text{m}$ ) |
|-------------------|----------------------|-----------------------|----------------------------------|
| 77                | 333                  | 250                   | 4.2                              |
| 225               | 381                  | 303                   | 3.7                              |
| 350               | 476                  | 413                   | 4.4                              |
| 473               | 613                  | 543                   | 3.6                              |
| 574               | 668                  | 621                   | 3                                |
| 575               | 825                  | 700                   | 3.6                              |

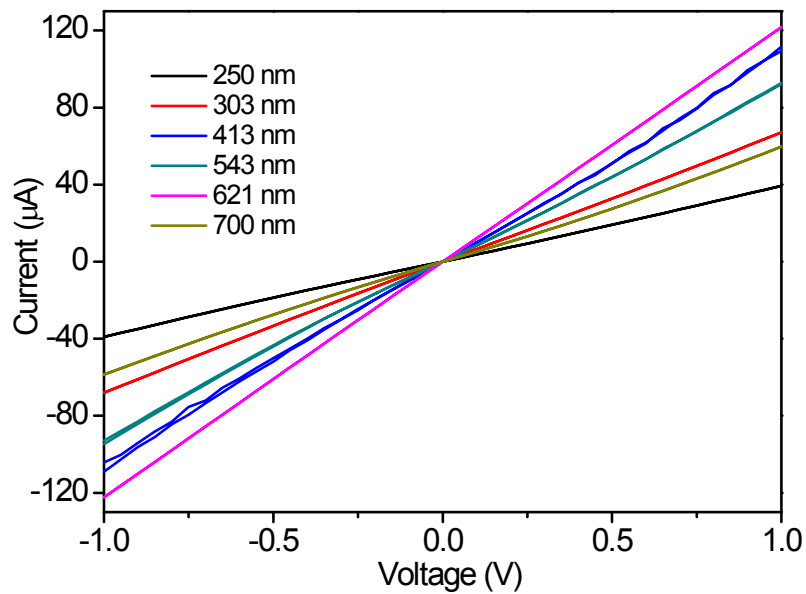

**Figure S1.** I-V curves of tapered  $\text{Si}_{1-x}\text{Ge}_x$  alloy nanowires. The contact between nanowire and metal electrodes shows ohmic behavior.

### 4-point measurement of electrical conductivity

Based on 4-point method, we measured the resistivity of SiGe alloy nanowire ( $d = \sim 80$  nm) which has similar structure and composition with SiGe alloy nanowire mentioned in manuscript.<sup>S1</sup> We confirmed that the resistivity is  $\sim 35$  m $\Omega$ ·cm which is very similar to the values obtained using 2-point measurement. Considering that contact problem becomes serious when diameter of nanowire is small<sup>S2</sup> and tapered nanowires show ohmic behavior, we infer that resistivity error from contact resistance is not significant.

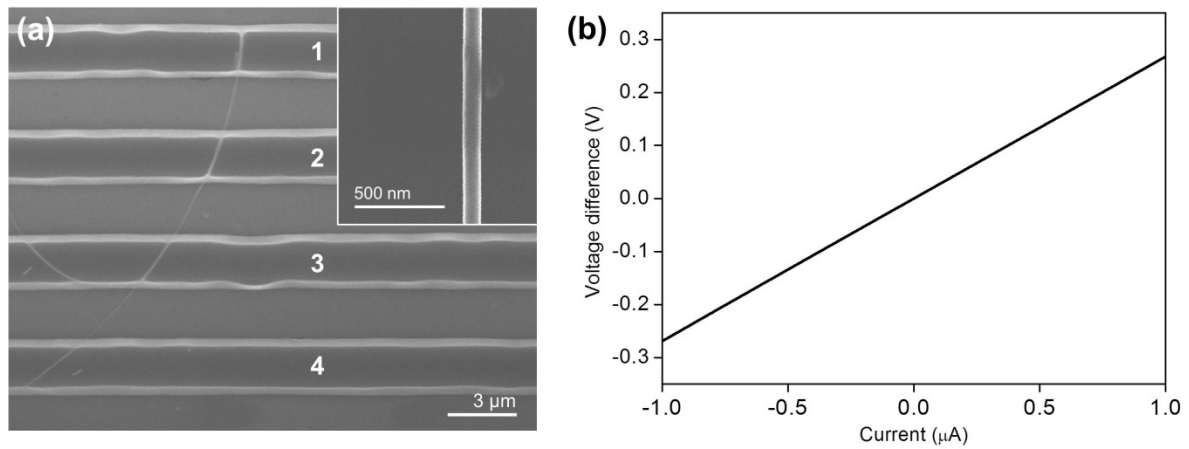

**Figure S2.** (a) A SEM image of the 4-point measurement device. (b) Applied current vs. voltage difference between electrode 2 and 3.

### Thermal properties measurement of tapered $\text{Si}_{1-x}\text{Ge}_x$ alloy nanowires

The as-grown nanowires were loaded on micro-fabricated devices by using a solution drop-dry method for measuring the thermal properties.<sup>S3-S5</sup> Before the loading, nanowires were dipped into BHF (5:1) to remove the oxide layer and cleaned by deionized water. This device has two adjacent membranes suspended by silicon nitride beams (inset of Fig 3(b)). Each membrane has a platinum resistance thermometer coil, which serves as a heater and a temperature sensor. Underlying Si substrate was etched by tetramethylammonium hydroxide (TMAH) solution to prevent a heat transfer through the silicon substrate. Thermal contact resistance was reduced by depositing Pt layers by using a focus ion beam (FIB) system at the junctions between nanowires and membranes, and annealing samples at 600 °C in high vacuum ( $< 10^{-6}$  Torr).

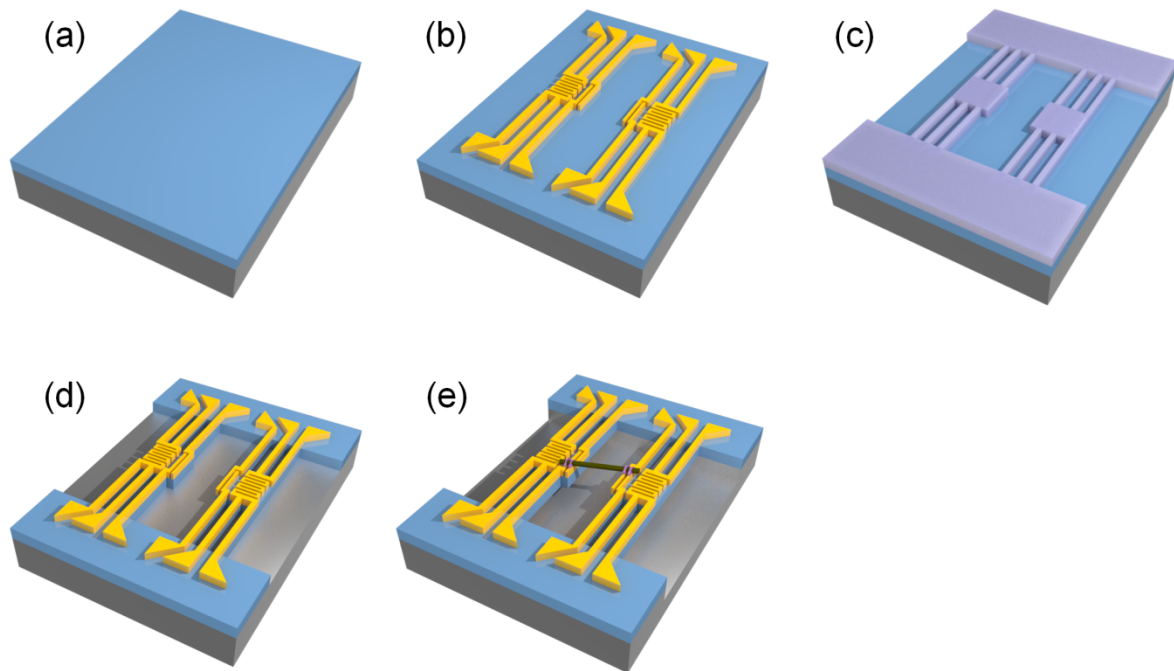

Fig. S3. A schematic of the micro-fabricated MEMS device for measuring nanowire thermal conductivity. (a)  $\text{SiN}_x$  deposition on Si substrate, (b) Patterning the heating and sensing membrane, (c) Photo lithography, (d)  $\text{SiN}_x$  and Si substrate etching, (e) Pt deposition using a FIB

## Supporting References

- S1. S. E. Mohny, Y. Wang, M. A. Cabassi, K. K. Lew, S. Dey, J. M. Redwing and T. S. Mayer, *Solid-State Electron.*, 2005, **49**, 227-232.
- S2. A. Chaudhry, V. Ramamurthi, E. Fong and M. S. Islam, *Nano Lett.*, 2007, **7**, 1536-1541.
- S3. C. T. Bui, R. Xie, M. Zheng, Q. Zhang, C. H. Sow, B. Li, J. Thong, *Small*, 2012, **8**, 621-626
- S4. J. Roh, K. Hippalgaonkar, J. H. Ham, R. Chen, M. Z. Li, P. Ercius, A. Majumdar, W. Kim and W. Lee, *ACS Nano*, 2011, **5**, 3954-3960
- S5. V. Singh, T. L. Bougher, A. Weathers, Y. Cai, K. Bi, M. Pettes, S. McMenamin, W. Lv, D. Resler, T. R. Gattuso, D. Altman, K. H. Sandhage, L. Shi, A. Henry and B. A. Cola, *Nat.Nanotechnol.*, 2014, **9**, 384-390
